# Supplementary material for: Inheritance of Black Rot Resistance and Development of Molecular Marker Linked to Xcc Races 6 and 7 Resistance in Cabbage
Source: MDPI journal article supplement (doi:10.3390/plants10091940), 2021-09-17
Supplement: s1 [file s1]

**Table S1.** Primer specifications of candidate Black rot resistance NBS gene *Bol031422*.

| Gene ID   | Forward sequence (Primer-F) | Reverse sequence (Primer-R) | TM (°C) | Product Size |
|-----------|-----------------------------|-----------------------------|---------|--------------|
| Bol031422 | ATGGGAGGTTGTTTCTCTGTCTCA    | AGATGACGAGGATGAATCAGAAAGTGA | 58      | 1134 bp      |
