# Supplementary material for: Inheritance of Black Rot Resistance and Development of Molecular Marker Linked to Xcc Races 6 and 7 Resistance in Cabbage
Source: MDPI journal article supplement (doi:10.3390/plants10091940), 2021-09-17
Supplement: s1 [file s1]

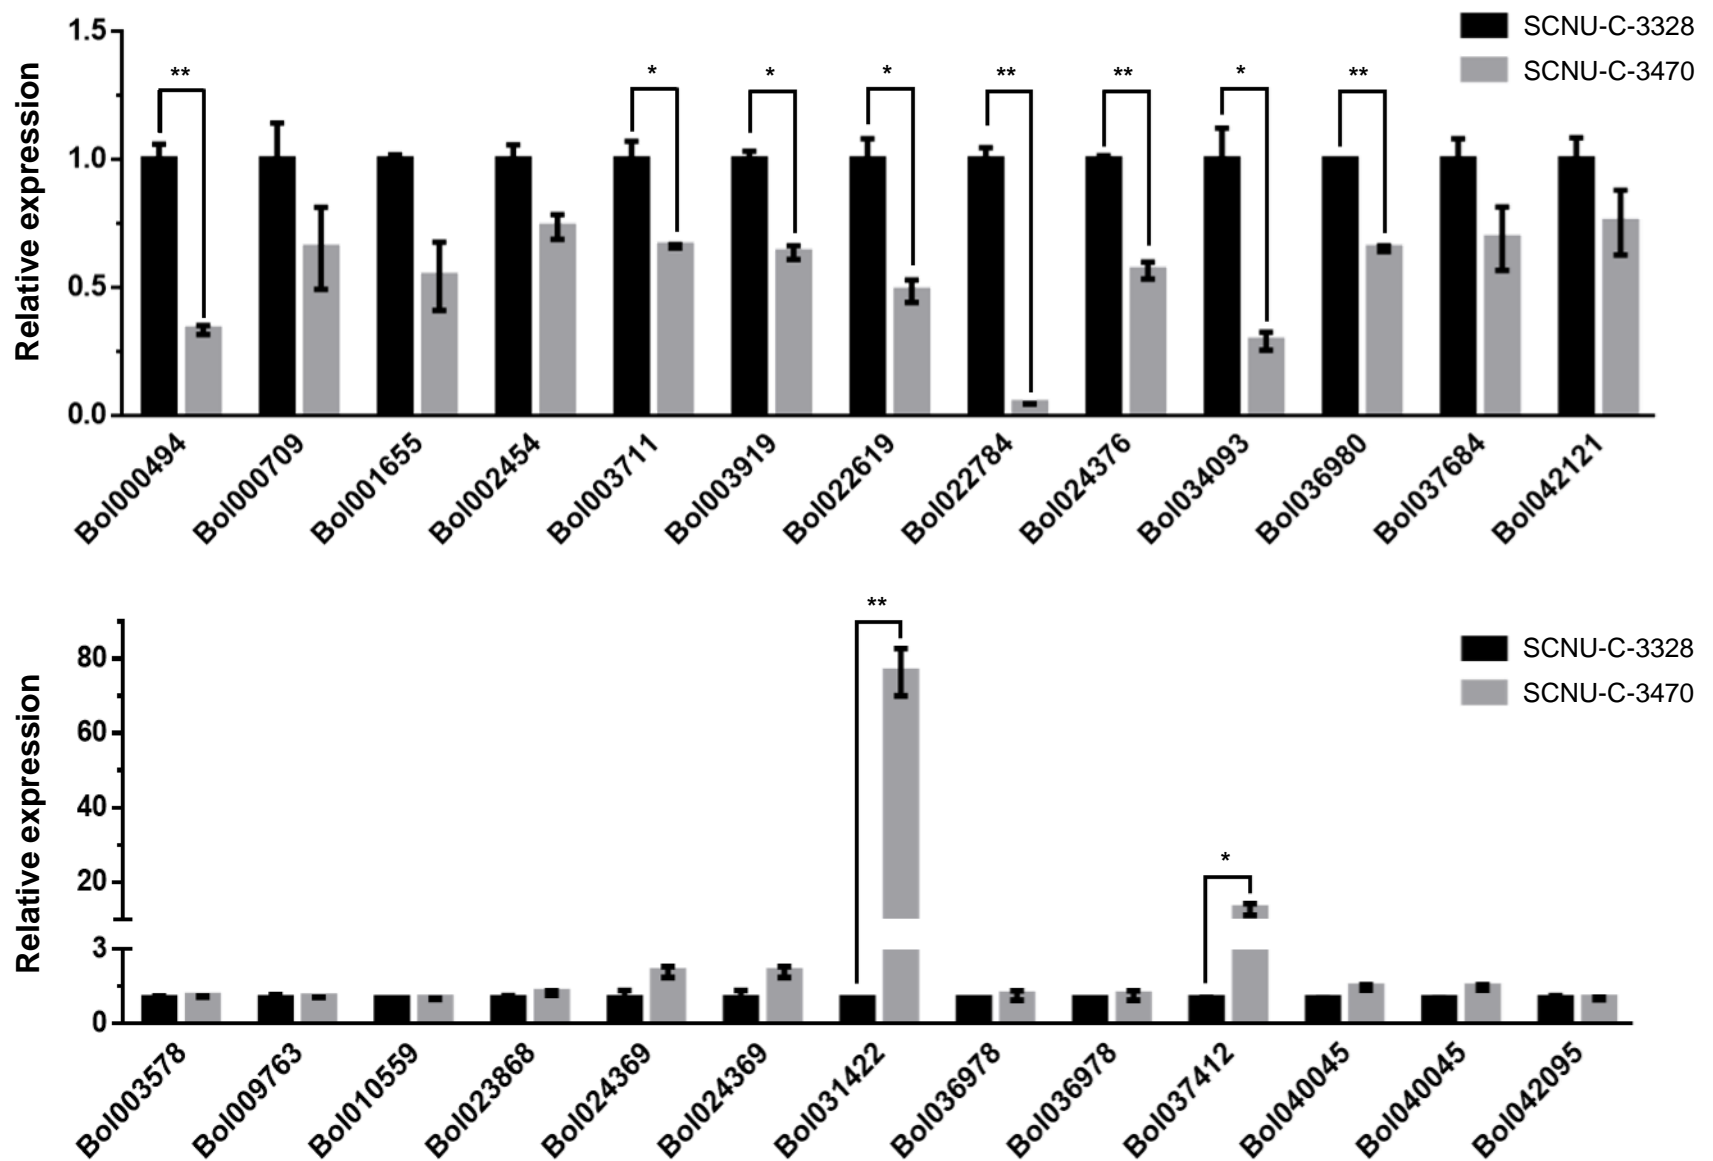

**Figure S2.** Mean normalized expression of candidate genes in susceptible (SCNU-C-3328) and resistant (SCNU-C-3470) cabbage lines. Error bar represents  $\pm$  S.E.M of the means of triplicates. Asterisks indicate significant difference in expression level (\* $P < 0.05$ , \*\* $P < 0.01$ , Student's t-test).
