# Supplementary material for: Inheritance of Black Rot Resistance and Development of Molecular Marker Linked to Xcc Races 6 and 7 Resistance in Cabbage
Source: MDPI journal article supplement (doi:10.3390/plants10091940), 2021-09-17
Supplement: s1 [file s1]

(A)

- Genomic DNA (gDNA) sequence

>Bol031422 (gDNA) Reference

ATGGGAGGTTGTTTCTCTGTCTCAGTTTCATGTGATCAAGTGGTGAATCAAGT  
CTCCCAATGTCTATGCCTCAATGGAAGTTATATCCACAATCTCCCCCAGAATCT  
AGGGACTCTCCATAAAGCCATGCGAGCTCTCAAGGCTAAGAGAGATGATGTT  
CAAGGGAGGGTAGACAGAGAAGAGTTTGCTGGACATCGTCGAAGGCTTGCT  
CAAGTCCAGGTATGGCTTACGAGTATCCTCACAATGGAAAACCAATATAATGA  
GCTTCTTAATACTAGTGAGGTTGAGCTTCAAAGGTTGTGTCTCTGTTCGATTTTG  
CTCTAAAAATGTGAAAAAGAGCTATCTTTATGGGAAAAGGGTTATGGTAATGT  
TGAGGGAGGTTGAGAGTCTTAGTTCTCAGGGAGAATTTAATGGGGTGACTGA  
TGAAACTCCTATAGCTGAGGGTGAAGAGTTGCCTATTCAACCAACCATAGGTC  
AGGAAACAATGCTGGAAATGGTATGGAACCGTCTGATGGAAGATGAAGTTGG  
GATTGTGGGTCTGTACGGTATGGGGGGAGTTGGCAAACCAACCTTCTCACG  
CAGATCAACAATAGGTTTTCTGATAGAGGGCATGGGTTCGGTGTGTGATATG  
GGTTGTGGTGTCTCAAAATGCAACAGTCCATAAGATTCAAGGGAGCATTGGT  
GAAAAGCTAGGCCTTGGGGGGAAAGAGTGGGAGGAGAAAAGAGAGATGAA  
GAGAGGCCAAGACATCCACAACGTTCTTAGGAAGAAGAAGGTTGTGTTATTG  
TTGGATGATATATGGGAGAAAGTGAATTTAAGTACGATTGGAGTCCCATATCC  
GAGCAAGGTAAATGGAAGCAAAGTAGTATTTACCACACGCTCTCGAGATGTG  
TGTGGGCGCATGGGGGTTGATGACCCGATCGAAGTCCGTTGTCTGGACACGG  
ACAAAGCCTGGGATTTGTTCAAAGAGAAAGTCGGAGAACACACACTGGGAA  
GGCACCCAGACATTCCCGAGCACGCAAGGAAAGTCGCAGGGAAATGTCGTG  
GCCTACCATTGGCACTTAATGTCATCGGCGAAACAATGTCCGTGCATGTTTAC  
TGTTGGAAGATGACGAGGATGAATCAGAAGTGA

>SCNU-C-3470 (gDNA) Resistant line

ATGGGAGGTTGTTTCTCTGTCTCAGTTTCATGTGATCAAGTGGTGAATCAAGT  
CTCCCAATGTCTATGCCTCAATGGAAGTTATATCCACAATCTCCCCCAGAATCT  
AGGGACTCTCCATAAAGCCATGCGAGCTCTCAAGGCTAAGAGAGATGATGTT  
CAAGGGAGGGTAGACAGAGAAGAGTTTGCTGGACATCGTCGAAGGCTTGCT  
CAAGTCCAGGTATGGCTTACGAGTATCCTCACAATGGAAAACCAATATAATGA  
GCTTCTTAATACTAGTGAGGTTGAGCTTCAAAGGTTGTGTCTCTGTTCGATTTTG  
CTCTAAAAATGTGAAAAAGAGCTATCTTTATGGGAAAAGGGTTATGGTAATGT

TGAGGGAGGTTGAGAGTCTTAGTTCTCAGGGAGAATTTAATGGGGTGACTGA  
TGAAACTCCTATAGCTGAGGGTGAAGAGTTGCCTATCCAACACACAATTGTTG  
GTCAGGAAACAATGCTGGAAATGGTATGGAACCGTCTGATGGAAGATGAAGT  
TGGGATTGTGGGTCTGTACGGTATGGGGGGAGTTGGCAAACCACCCTTCTC  
ACGCAGATCAACAATAGGTTTTCTGATAGAGGGCATGGGTTCCGGTGTGTGAT  
ATGGGTTGTGGTGTCTCAAAATGCAACAGTCCATAAGATTCAAGGGAGCATT  
GGTGAAAAGCTAGGCCTTGGGGGGAAAGAGTGGGAGGAGAAAAGTGAGAT  
GAAGAGAGGCCAAGACATCCACAACGTTCTTAGGAAGAAGAAGTTTGTGTT  
ATTGTTGGATGATATATGGGAGAAAGTGAATTTAAGTACGATTGGAGTCCCAT  
ATCCGAGCAAGGTAAATGGAAGCAAAGTAGTATTTACCACACGCTCTCGAGA  
TGTGTGTGGGCGCATGGGGGTTGATGACCCGATCGAAGTCCGTTGTCTGGAC  
ACGGACAAAGCCTGGGATTTGTTCAAAGAGAAAGTCGGAGAACACACACTG  
GGAAGGCACCCAGACATTCCCGAGCACGCAAGGAAAGTCGCAGGGAAATGT  
CGTGGCCTACCATTGGCACTTAATGTCATCGGCGAAACAATGTCCGTGCATGT  
TACTGTTGGAAGATGACGAGGATGAATCAGAAGTGA

>SCNU-C-3328 (gDNA) Susceptible line

ATGGGAGGTTGTTTCTCTGTCTCATTGTCATGTGATCAAGTGGTGAATCAAGTC  
TTCCGATGTCTATGCCTCAAAGGAAGTTATGTCCACAACCTCCCCCAGAATCT  
AGCGTCACTGGAGAAAGCCATGGGAACTCTCACGGCTAAGAGAGATGATGTT  
CAAGGGAGGGTAGACAGAGAAGAGTTTACTGGACATCGTCGAAGGCTTGCT  
CAAGTCCAGGTATGGCTTACGAGTATCCTCACAATGGAAAACCAATATAATGA  
GCTTCTTAATACTAGAGACGTTGAGCTTCAAAGGTTGTGTCTCTGTGATTTTG  
CTCTAAAAATGTGAAAAAGAGCTATCTTTATGGGAAAAGGGTTATGGTAATGT  
TGAGGGAGGTTGAGAGTCTTATCCGTCAACAACGAGAATTTGATGAGGTGAC  
TGACGCAACTCCTATAGCTGAGGGTGAAGAGTTGCCTATTCAACCAACCATA  
GGTCAGGAAACAATGCTGGAAATGGTATGGAACCGTCTGATGGAAGATGAA  
GTTGGGATTGTGGGTCTGTACGGTATGGGTGGAGTTGGCAAACCTACCCTTCT  
CACGCAGATCAACAATAGGTTTTCTAAAAGAGGTGGTGGGTTTGATGTTGTGA  
TATGGGTTGTGGTGTCAAAAATGCAACAGTCCATAAGATTCAAGGGAGCAT  
CGGTGAAAAGCTAGGGCTTCTGGGGAAAGAGTGGGACGAGAAAAGTGAGAT  
GAAGAGAGGCCAAGACATCCACAACGTTCTTAGGAAGAAGAAGTTTGTGTT  
ATTGTTGGATGATATATGGGAGAAAGTGAATTTAAGTACGATTGGAGTCCCAT  
ATCCGAGCAAAGTAAATGGAAGCAAAGTAGCATTACCACACGCTCTCGAGA  
TGTGTGTGGACGCATGGAGGTTGATGATCCGATCGAAGTCCGTTGTCTGGACA  
CGGACAAAGCCTGGGATTTGTTCAAAAAGAAAGTCGGGGAAAACACGTTGG

GAAGCCACCCAGGCATTCCCGAGCTCGCAAGGGAAGTCGCTGGGAAATGTC  
 GTGGCCTACCATTTGGCCCTTAATGTCATCGGTGGAACAATGGCGAGCAAAAG  
 ATCACTACAAGAGTGGCGTCTAGCAGTTGATGTTTTGACTTCATCTGCCAGAG  
 AGTTTTTCAGGCGTGGAAGATGAGATTCTTCAGATATTGAAGTATAGCTACGAT  
 AGTTTGGATGGTGAGATGACCAAGTCATGTTTTCTGTATTGCTCTCTGTTTCCT  
 GAAGATGACATTATTGATAAAGAAGAAGTATGATAGAGTATTGGATAGGTGAGG  
 GGTTCATTGATGAGAAGGAAGGAAGAGAAATGGCAATGAACAAAGGTTATG  
 AGATACTCGAGACCCTTGTCCGTGCATGTTTGTGTTGGAAGATGACGAGGAT  
 GAATCAGAAGTGA

## - gDNA alignment

|                                                            |    |
|------------------------------------------------------------|----|
| Bol031422                                                  |    |
| ATGGGAGGTTGTTTCTGTCTCAGTTTCATGTGATCAAGTGGTGAATCAAGTCTCCCAA | 60 |
| SCNU-C-3470                                                |    |
| ATGGGAGGTTGTTTCTGTCTCAGTTTCATGTGATCAAGTGGTGAATCAAGTCTCCCAA | 60 |
| SCNU-C-3328                                                |    |
| ATGGGAGGTTGTTTCTGTCTCATTGTGATGTGATCAAGTGGTGAATCAAGTCTTCCGA | 60 |
| ***** * * * * *                                            |    |

|                                                             |     |
|-------------------------------------------------------------|-----|
| Bol031422                                                   |     |
| TGTCTATGCCTCAATGGAAGTTATATCCACAATCTCCCCAGAATCTAGGGACTCTCCAT | 120 |
| SCNU-C-3470                                                 |     |
| TGTCTATGCCTCAATGGAAGTTATATCCACAATCTCCCCAGAATCTAGGGACTCTCCAT | 120 |
| SCNU-C-3328                                                 |     |
| TGTCTATGCCTCAAAGGAAGTTATGTCCACAACCTCCCCAGAATCTAGCGTCACTGGAG | 120 |
| ***** * * * * *                                             |     |

|                                                              |     |
|--------------------------------------------------------------|-----|
| Bol031422                                                    |     |
| AAAGCCATGCGAGCTCTCAAGGCTAAGAGAGATGATGTTCAAGGGAGGGTAGACAGAGAA | 180 |
| SCNU-C-3470                                                  |     |
| AAAGCCATGCGAGCTCTCAAGGCTAAGAGAGATGATGTTCAAGGGAGGGTAGACAGAGAA | 180 |
| SCNU-C-3328                                                  |     |
| AAAGCCATGGGAACTCTCACGGCTAAGAGAGATGATGTTCAAGGGAGGGTAGACAGAGAA | 180 |
| ***** * * * * *                                              |     |

|                                                              |     |
|--------------------------------------------------------------|-----|
| Bol031422                                                    |     |
| GAGTTTGCTGGACATCGTCGAAGGCTTGCTCAAGTCCAGGTATGGCTTACGAGTATCCTC | 240 |
| SCNU-C-3470                                                  |     |
| GAGTTTGCTGGACATCGTCGAAGGCTTGCTCAAGTCCAGGTATGGCTTACGAGTATCCTC | 240 |
| SCNU-C-3328                                                  |     |
| GAGTTTACTGGACATCGTCGAAGGCTTGCTCAAGTCCAGGTATGGCTTACGAGTATCCTC | 240 |
| ***** * * * * *                                              |     |

|                                                              |     |
|--------------------------------------------------------------|-----|
| Bol031422                                                    |     |
| ACAATGGAAAACCAATATAATGAGCTTCTTAATACTAGTGAGGTTGAGCTTCAAAGGTTG | 300 |
| SCNU-C-3470                                                  |     |
| ACAATGGAAAACCAATATAATGAGCTTCTTAATACTAGTGAGGTTGAGCTTCAAAGGTTG | 300 |

SCNU-C-3328  
ACAATGGAAAACCAATATAATGAGCTTCTTAATACTAGAGACGTTGAGCTTCAAAGGTTG 300  
\*\*\*\*\*

Bol031422  
TGTCTCTGTCGATTTTGCTCTAAAAATGTGAAAAAGAGCTATCTTTATGGGAAAAGGGTT 360  
SCNU-C-3470  
TGTCTCTGTCGATTTTGCTCTAAAAATGTGAAAAAGAGCTATCTTTATGGGAAAAGGGTT 360  
SCNU-C-3328  
TGTCTCTGTCGATTTTGCTCTAAAAATGTGAAAAAGAGCTATCTTTATGGGAAAAGGGTT 360  
\*\*\*\*\*

Bol031422 ATGGTAATGTTGAGGGAGGTTGAGAGTCTTAGTT---CTCAGGGAGAATTAAATGGGGTG  
417  
SCNU-C-3470 ATGGTAATGTTGAGGGAGGTTGAGAGTCTTAGTT---  
CTCAGGGAGAATTAAATGGGGTG 417  
SCNU-C-3328  
ATGGTAATGTTGAGGGAGGTTGAGAGTCTTATCCGTCACAACGAGAATTTGATGAGGTG 420  
\*\*\*\*\*

Bol031422 ACTGATGAAACTCCTATAGCTGAGGGTGAAGAGTTGCCTATTCAACCAACCATAG---GT  
474  
SCNU-C-3470  
ACTGATGAAACTCCTATAGCTGAGGGTGAAGAGTTGCCTATCCAACACACAATTGTTCGT 477  
SCNU-C-3328 ACTGACGCAACTCCTATAGCTGAGGGTGAAGAGTTGCCTATTCAACCAACCATAG---  
GT 477  
\*\*\*\*\*

Bol031422  
CAGGAAACAATGCTGGAAATGGTATGGAACCGTCTGATGGAAGATGAAGTTGGGATTGTG 534  
SCNU-C-3470  
CAGGAAACAATGCTGGAAATGGTATGGAACCGTCTGATGGAAGATGAAGTTGGGATTGTG 537  
SCNU-C-3328  
CAGGAAACAATGCTGGAAATGGTATGGAACCGTCTGATGGAAGATGAAGTTGGGATTGTG 537  
\*\*\*\*\*

Bol031422  
GGTCTGTACGGTATGGGGGGAGTTGGCAAAACCACCCTTCTCACGCAGATCAACAATAGG 594  
SCNU-C-3470  
GGTCTGTACGGTATGGGGGGAGTTGGCAAAACCACCCTTCTCACGCAGATCAACAATAGG 597  
SCNU-C-3328  
GGTCTGTACGGTATGGGTGGAGTTGGCAAAACTACCCTTCTCACGCAGATCAACAATAGG 597  
\*\*\*\*\*

Bol031422  
TTTTCTGATAGAGGGCATGGGTTCGGTGTGTGATATGGGTTGTGGTGTCTCAAAATGCA 654  
SCNU-C-3470  
TTTTCTGATAGAGGGCATGGGTTCGGTGTGTGATATGGGTTGTGGTGTCTCAAAATGCA 657  
SCNU-C-3328  
TTTTCTAAAAGAGGTGGTGGTGTGATGTGTGATATGGGTTGTGGTGTCAAAAATGCA 657  
\*\*\*\*\*

Bol031422  
ACAGTCCATAAGATTCAAGGGAGCATTGGTGAAAAGCTAGGCCTTGGGGGGAAAGAGTGG 714  
SCNU-C-3470  
ACAGTCCATAAGATTCAAGGGAGCATTGGTGAAAAGCTAGGCCTTGGGGGGAAAGAGTGG 717

SCNU-C-3328  
 ACAGTCCATAAGATTCAAGGGAGCATCGGTGAAAAGCTAGGGCTTCTGGGGAAAGAGTGG 717  
 \*\*\*\*\*

Bol031422  
 GAGGAGAAAAGAGAGATGAAGAGAGGCCAAGACATCCACAACGTTCTTAGGAAGAAGAAG 774  
 SCNU-C-3470  
 GAGGAGAAAAGTGAAGAGAGGCCAAGACATCCACAACGTTCTTAGGAAGAAGAAG 777  
 SCNU-C-3328  
 GACGAGAAAAGTGAAGAGAGGCCAAGACATCCACAACGTTCTTAGGAAGAAGAAG 777  
 \*\*\*\*\*

Bol031422  
 GTTGTGTTATTGTTGGATGATATATGGGAGAAAGTGAATTTAAGTACGATTGGAGTCCCA 834  
 SCNU-C-3470  
 TTTGTGTTATTGTTGGATGATATATGGGAGAAAGTGAATTTAAGTACGATTGGAGTCCCA 837  
 SCNU-C-3328  
 TTTGTGTTATTGTTGGATGATATATGGGAGAAAGTGAATTTAAGTACGATTGGAGTCCCA 837  
 \*\*\*\*\*

Bol031422  
 TATCCGAGCAAGGTAAATGGAAGCAAAGTAGTATTACCACACGCTCTCGAGATGTGTGT 894  
 SCNU-C-3470  
 TATCCGAGCAAGGTAAATGGAAGCAAAGTAGTATTACCACACGCTCTCGAGATGTGTGT 897  
 SCNU-C-3328  
 TATCCGAGCAAAGTAAATGGAAGCAAAGTAGCATTACCACACGCTCTCGAGATGTGTGT 897  
 \*\*\*\*\*

Bol031422  
 GGGCGCATGGGGGTTGATGACCCGATCGAAGTCCGTTGTCTGGACACGGACAAAGCCTGG 954  
 SCNU-C-3470  
 GGGCGCATGGGGGTTGATGACCCGATCGAAGTCCGTTGTCTGGACACGGACAAAGCCTGG 957  
 SCNU-C-3328  
 GGACGCATGGAGGTTGATGATCCGATCGAAGTCCGTTGTCTGGACACGGACAAAGCCTGG 957  
 \*\*\*\*\*

Bol031422  
 GATTTGTTCAAAGAGAAAAGTCGGAGAACACACACTGGGAAGGCACCCAGACATTCCCGAG 1014  
 SCNU-C-3470  
 GATTTGTTCAAAGAGAAAAGTCGGAGAACACACACTGGGAAGGCACCCAGACATTCCCGAG 1017  
 SCNU-C-3328  
 GATTTGTTCAAAGAGAAAAGTCGGGGAAAACACGTTGGGAAGCCACCCAGGCATTCCCGAG 1017  
 \*\*\*\*\*

Bol031422  
 CACGCAAGGAAAGTCGCAGGGAAATGTCGTGGCCTACCATTGGCACTTAATGTCATCGGC 1074  
 SCNU-C-3470  
 CACGCAAGGAAAGTCGCAGGGAAATGTCGTGGCCTACCATTGGCACTTAATGTCATCGGC 1077  
 SCNU-C-3328  
 CTCGCAAGGGAAGTCGCTGGGAAATGTCGTGGCCTACCATTGGCCCTTAATGTCATCGGT 1077  
 \*\*\*\*\*

Bol031422 GAAACAATG----- 1083  
 SCNU-C-3470 GAAACAATG----- 1086  
 SCNU-C-3328  
 GGAACAATG**CGGAGCAAAAGATCACTACAAGAGTGGCGTCTAGCAGTTGATGTTTTGACT** 1137

\* \*\*\*\*

Bol031422 ----- 1083  
SCNU-C-3470 ----- 1086  
SCNU-C-3328  
**TCATCTGCCAGAGAGTTTTTCAGGCGTGGAAGATGAGATTCTTCAGATATTGAAGTATAGC** 1197

Bol031422 ----- 1083  
SCNU-C-3470 ----- 1086  
SCNU-C-3328  
**TACGATAGTTTGGATGGTGAGATGACCAAGTCATGTTTTCTGTATTGCTCTCTGTTTCCT** 1257

Bol031422 ----- 1083  
SCNU-C-3470 ----- 1086  
SCNU-C-3328  
**GAAGATGACATTATTGATAAAGAAGAACTGATAGAGTATTGGATAGGTGAGGGGTTTCATT** 1317

Bol031422 ----- 1083  
SCNU-C-3470 ----- 1086  
SCNU-C-3328  
**GATGAGAAGGAAGGAAGAGAAATGGCAATGAACAAAGGTTATGAGATACTCGAGACCCTT** 1377

Bol031422 -TCCGTGCATGTTTACTGTTGGA**AGATGACGAGGATGAATCAGAAAGTGA**  
1131  
SCNU-C-3470 -TCCGTGCATGTTTACTGTTGGA**AGATGACGAGGATGAATCAGAAAGTGA**  
1134  
SCNU-C-3328 **G**TCCGTGCATGTTTGTGTTGGA**AGATGACGAGGATGAATCAGAAAGTGA**  
1426

\*\*\*\*\* . \*\*\*\*\*

**(B)**

**- Protein sequence**

>Bol031422 (Protein) Reference

MGGCFSVSVSCDQVVNQVSQCLCLNGSYIHNLQPQLGTLHKAMRALKAKRDDV  
QGRVDREEFAGHRRRLAQVQVWLTSILTMENQYNELLNTSEVELQRLCLCRFCSK  
NVKKSYLEYLGKRVMLREVESLSSQGEFNGVTDETPIAEGEELPIQPTIGQETMLE  
MVWNRLMEDEVGIVGLYGMGGVGKTTLLTQINNRFSDRGHGFVVIWVVVSQN  
ATVHKIQGSIGEKLGGLGGKEWEEKREMKRGQDIHNVLRKKKVLLDDIWEKVN  
LSTIGVPYPSKVNGSKVVFTRSRDVCGRMGVDDPIEVRCLDTDKAWDLFKEKVG  
EHTLGRHPDIPEHARKVAGKCRGLPLALNVIGETMSVHVYCWMTRMNQK

>SCNU-C-3470 (Protein) Resistant line

MGGCFSVSVSCDQVVNQVSQCLCLNGSYIHNLQPQLGTLHKAMRALKAKRDDV  
QGRVDREEFAGHRRRLAQVQVWLTSILTMENQYNELLNTSEVELQRLCLCRFCSK  
NVKKSYLEYLGKRVMLREVESLSSQGEFNGVTDETPIAEGEELPIQHTIVGQETML  
EMVWNRLMEDEVGIVGLYGMGGVGKTTLLTQINNRFSDRGHGFVVIWVVVSQ  
NATVHKIQGSIGEKLGGLGGKEWEEKSEMKGQDIHNVLRKKKFVLLDDIWEKV  
NLSTIGVPYPSKVNGSKVVFTRSRDVCGRMGVDDPIEVRCLDTDKAWDLFKEKV  
GEHTLGRHPDIPEHARKVAGKCRGLPLALNVIGETMSVHVYCWMTRMNQK

>SCNU-C-3328 (Protein) Susceptible line

MGGCFSVSLSCDQVVNQVFRCLCLKGSYVHNLPQNLASLEKAMGTLTAKRDDV  
QGRVDREEFTGHRRRLAQVQVWLTSILTMENQYNELLNTRDVELQRLCLCRFCS  
KNVKKSYLYGKRVMLREVESLIRQQREFDEVTDATPIAEGEELPIQPTIGQETM  
LEMVWNRLMEDEVGIVGLYGMGGVGKTTLLTQINNRFSGKGGGFDVVIWVVVS  
QNATVHKIQGSIGEKLGGLGKEWDEKSEMKGQDIHNVLRKKKFVLLDDIWEK  
VNLSTIGVPYPSKVNGSKVAFTRSRDVCGRMEVDDPIEVRCLDTDKAWDLFKKK  
VGENTLGSHPGIPELAREVAGKCRGLPLALNVIGGTMASKRSLQEWRLAVDVLTS  
SAREFSGVEDEILQILKYSYDSLKGEMTKSCFLYCSLFPEDDIIDKEELIEYWIGEGFI  
DEKEGREMAMNKGYEILETLVRACLLEDEDESEV

**- Protein alignment**

Bol031422 MGGCFSVSVSCDQVVNQVSQCLCLNGSYIHNLQPQLGTLHKAMRALKAKRDDVQGRVDRE

SCNU-C-3470  
MGGCFSVSVSCDQVVNQVSQCLCLNGSYIHNLQPQLGTLHKAMRALKAKRDDVQGRVDRE  
60

SCNU-C-3328  
MGGCFSVSLSCDQVVNQVFRCLCLKGSYVHNLPQNLASLEKAMGTLTAKRDDVQGRVDRE  
60

\*\*\*\*\*.\*\*\*\*\*.\*\*\*\*.\*\*\*.\*\*\*\*\*.\*\*\*.\*\*\*.\*\*\*.\*\*\*\*\*

Bol031422 EFAGHRRRLAQVQVWLTSILTMENQYNELLNTSEVELQRLCLCRFC SKNVKKS YLYGKRV  
120

SCNU-C-3470  
EFAGHRRRLAQVQVWLTSILTMENQYNELLNTSEVELQRLCLCRFC SKNVKKS YLYGKRV  
120

SCNU-C-3328  
EFTGHRRRLAQVQVWLTSILTMENQYNELLNTRDVELQRLCLCRFC SKNVKKS YLYGKRV  
120

\*\*\*.\*\*\*\*\*.\*\*\*\*\*.\*\*\*\*\*.\*\*\*\*\*.\*\*\*\*\*.\*\*\*\*\*.\*\*\*\*\*

Bol031422 MVMLREVESLS-SQGEFNGVTDETPIAEGEELPIQPTIG-QETMLEMVWNRLMEDEVGIV  
178

SCNU-C-3470 MVMLREVESLS-SQGEFNGVTDETPIAEGEELPIQHTIVGQETMLEMVWNRLMEDEVGIV  
179

SCNU-C-3328 MVMLREVESLIRQQREFDEVTDATPIAEGEELPIQPTIG-QETMLEMVWNRLMEDEVGIV  
179

\*\*\*\*\*.\*\*\*.\*\*\*.\*\*\*\*\*.\*\*\*\*\*.\*\*\*\*\*.\*\*\*\*\*.\*\*\*\*\*

Bol031422 GLYGMGGVGKTTLLTQINNRFSDRGHGFVVIWVVVSQNATVHKIQGSIGEKLG LGGKEW  
238

SCNU-C-3470 GLYGMGGVGKTTLLTQINNRFSDRGHGFVVIWVVVSQNATVHKIQGSIGEKLG LGGKEW  
239

SCNU-C-3328 GLYGMGGVGKTTLLTQINNRF SKRGGGFDVVIWVVVSQNATVHKIQGSIGEKLG LGGKEW  
239

\*\*\*\*\*.\*\*\*\*\*.\*\*\*\*\*.\*\*\*\*\*.\*\*\*\*\*.\*\*\*\*\*.\*\*\*\*\*.\*\*\*\*\*

Bol031422 EEKREMKRGQDIHNVL RKKKV LLLDDIWEK VNLSTIGVPYPSKVNGSKV VFTT SRDVC 298

SCNU-C-3470 EEKSEMKRGQDIHNVL RKKKFV LLLDDIWEK VNLSTIGVPYPSKVNGSKV VFTT SRDVC  
299

SCNU-C-3328 DEKSEMKRGQDIHNVL RKKKFV LLLDDIWEK VNLSTIGVPYPSKVNGSKV AFTT SRDVC 299

\*\*\*.\*\*\*\*\*.\*\*\*\*\*.\*\*\*\*\*.\*\*\*\*\*.\*\*\*\*\*.\*\*\*\*\*.\*\*\*\*\*

Bol031422 GRMGVDDPIEVRCLD TDKAWDLFKEKVGEHTLGRHPDIPEHARKVAGKCRGLPLALNVIG  
358

SCNU-C-3470 GRMGVDDPIEVRCLD TDKAWDLFKEKVGEHTLGRHPDIPEHARKVAGKCRGLPLALNVIG  
359

SCNU-C-3328 GRMEVDDPIEVRCLD TDKAWDLFKKKVGENTLGSHPGIPELAREVAGKCRGLPLALNVIG  
359

\*\*\*.\*\*\*\*\*.\*\*\*\*\*.\*\*\*\*\*.\*\*\*\*\*.\*\*\*\*\*.\*\*\*\*\*.\*\*\*\*\*



|             |                                                                       |     |
|-------------|-----------------------------------------------------------------------|-----|
| Bol031422   | ETMSVHVYCWKMTRMNQK-----                                               | 376 |
| SCNU-C-3470 | ETMSVHVYCWKMTRMNQK-----                                               | 377 |
| SCNU-C-3328 | GTMASKRSLQEWRLAVDV <b>LTSSAREFSGVEDEILQILKYSYD</b> SLDGEMTKSCFLYCSLFP |     |
| 419         |                                                                       |     |
|             | **:: : :                                                              |     |
| Bol031422   | -----                                                                 | 376 |
| SCNU-C-3470 | -----                                                                 | 377 |
| SCNU-C-3328 | <b>EDDIIDKEELIEYWIGEGFIDEKEGREMAMNKGYEILETLVRACLLLEDEDESEV</b>        | 475 |

**Figure S3.** Sequence information obtained by cloning and sequencing of cabbage resistant (SCNU-C-3470) and susceptible (SCNU-C-3328) lines for a NBS-LRR gene (*Bol031422*) and their alignments. Genomic DNA (gDNA) sequence and their alignment (A), protein sequence and their alignment (B). Sequence alignments along with the references sequences retrieved from Bolbase (<http://www.ocri-genomics.org/bolbase/>) considering *Brassica oleracea* as reference genome database. In sequence alignment asterisks (\*) indicate sequence similarity. Absence of asterisks indicates sequence dissimilarity. Endesh (-) indicates insertion/deletion of nucleotides. The grey and red highlights in the alignment of genomic DNA sequences indicate the BR6-InDel-F and BR6-InDel-R, respectively. The red text colors in the alignment of genomic sequences indicate InDel regions.
