# Supplementary material for: Inheritance of Black Rot Resistance and Development of Molecular Marker Linked to Xcc Races 6 and 7 Resistance in Cabbage
Source: MDPI journal article supplement (doi:10.3390/plants10091940), 2021-09-17
Supplement: s1 [file s1]

**Table S3.** Comparison of bioassay and molecular screening results for black rot resistance in cabbage inbred lines. S; susceptible, H; hetero, R; resistant

| Sl. No.        | Lines       | Race 6    | BR6-InDel | Race 7    | BR6-InDel |
|----------------|-------------|-----------|-----------|-----------|-----------|
|                |             | Phenotype | Genotype  | Phenotype | Genotype  |
| 1              | SCNU-C-106  | S         | H         | S         | H         |
| 2              | SCNU-C-107  | S         | H         | R         | H         |
| 3              | SCNU-C-3122 | S         | R         | S         | R         |
| 4              | SCNU-C-3270 | S         | H         | R         | H         |
| 5              | SCNU-C-3273 | S         | S         | -         | S         |
| 6              | SCNU-C-3305 | S         | H         | S         | H         |
| 7              | SCNU-C-3328 | S         | S         | S         | S         |
| 8              | SCNU-C-3412 | S         | S         | S         | S         |
| 9              | SCNU-C-3414 | S         | H         | -         | H         |
| 10             | SCNU-C-3449 | S         | S         | S         | S         |
| 11             | SCNU-C-3470 | R         | R         | R         | R         |
| 12             | SCNU-C-3631 | S         | H         | S         | H         |
| 13             | SCNU-C-3637 | S         | H         | S         | H         |
| 14             | SCNU-C-3639 | S         | S         | S         | S         |
| 15             | SCNU-C-4059 | S         | S         | R         | S         |
| 16             | SCNU-C-4066 | S         | H         | S         | H         |
| 17             | SCNU-C-4071 | S         | S         | S         | S         |
| 18             | SCNU-C-4072 | S         | S         | S         | S         |
| 19             | SCNU-C-4073 | S         | H         | S         | H         |
| 20             | SCNU-C-4074 | S         | H         | S         | H         |
| 21             | SCNU-C-4085 | S         | H         | S         | H         |
| 22             | SCNU-C-4105 | S         | R         | S         | R         |
| 23             | SCNU-C-4118 | R         | H         | S         | H         |
| 24             | SCNU-C-4161 | S         | H         | S         | H         |
| 25             | SCNU-C-4168 | S         | H         | S         | H         |
| 26             | SCNU-C-4302 | S         | S         | S         | S         |
| 27             | SCNU-C-4320 | S         | H         | S         | H         |
| Matched        |             |           | 23.0      |           | 19.0      |
| Not matched    |             |           | 4.0       |           | 6.0       |
| % Adaptability |             |           | 85.2      |           | 76.0      |
