# Supplementary figures and images for: Inheritance of Black Rot Resistance and Development of Molecular Marker Linked to Xcc Races 6 and 7 Resistance in Cabbage
Source: MDPI journal article supplement (doi:10.3390/plants10091940), 2021-09-17

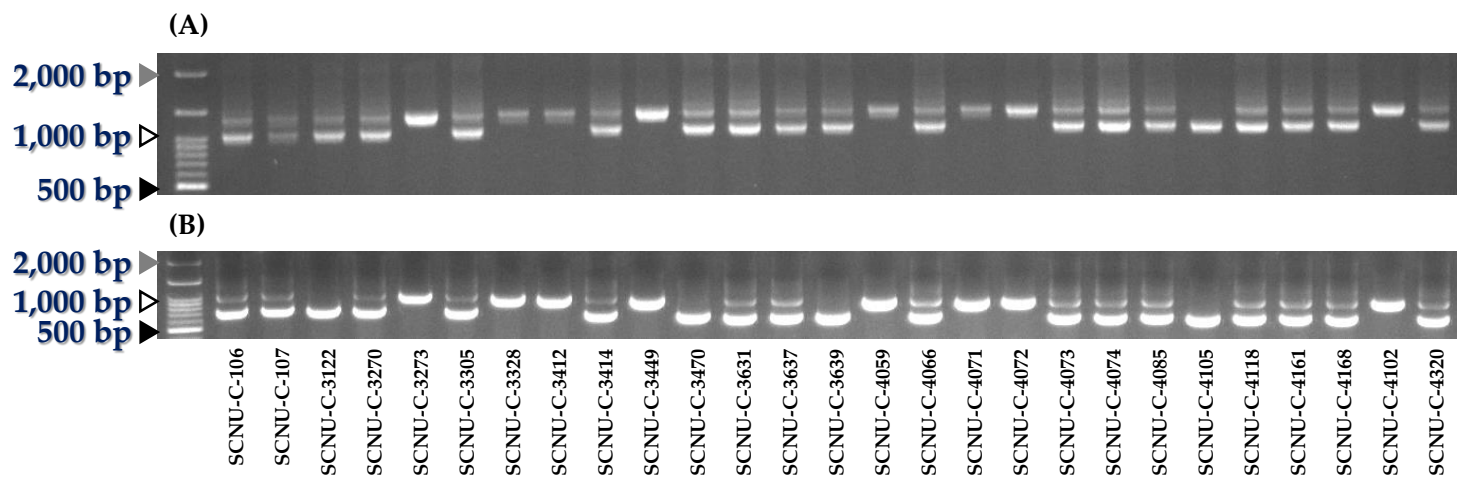

**Figure S4.** Banding profile of *R* gene (Bol031422) in 27 inbred cabbage lines using Pimer-F/R (A), BR6-InDel-F/R (B).

Supplement: s1 [file s1]
